# Supplementary material for: Effects of Weak Acids on the Microbiological, Nutritional and Sensory Quality of Baltic Herring (Clupea harengus membras)
Source: MDPI journal article supplement (doi:10.3390/foods11121717), 2022-06-12
Supplement: s1 [file s1]

**Table S1.** Concentration of acids in and pH values of pickling and marinade solutions of training samples of 0 months' sensory evaluation.

| <b>Acid</b>                | <b>Concentration in Pickling Solution (g/L)</b> | <b>Concentration in Marinade Solution (g/L)</b> | <b>pH of Pickling Solution</b> | <b>pH at the End of Pickling</b> |
|----------------------------|-------------------------------------------------|-------------------------------------------------|--------------------------------|----------------------------------|
| Acetic acid <sup>1</sup>   | 40.0                                            | 0.67                                            | 2.71                           | 4.66                             |
| Acetic acid <sup>2</sup>   | 50.0                                            | 0.67                                            | 2.32                           | 3.78                             |
| Citric acid <sup>2</sup>   | 20.0                                            | 0.17                                            | 1.93                           | 3.78                             |
| Lactic acid <sup>1</sup>   | 15.6                                            | 0.17                                            | 2.12                           | 4.00                             |
| Malic acid <sup>2</sup>    | 20.0                                            | 0.14                                            | 2.04                           | 3.65                             |
| Tartaric acid <sup>1</sup> | 21.5                                            | 0.14                                            | 1.65                           | 3.30                             |

<sup>1</sup> Samples used in the first week of sensory evaluation training. <sup>2</sup> Samples used in the second week of sensory evaluation training.
